RESEARCH ARTICLE

# Genetic Diversity and Symbiotic Efficiency of Nodulating Rhizobia Isolated from Root Nodules of Faba Bean in One Field

Lan Zou<sup>1</sup>\*, Yuan Xue Chen<sup>1</sup>\*, Petri Penttinen<sup>2</sup>\*, Qin Lan<sup>1</sup>, Ke Wang<sup>1</sup>, Ming Liu<sup>1</sup>, Dan Peng<sup>1</sup>, Xiaoping Zhang<sup>1</sup>, Qiang Chen<sup>1</sup>, Ke Zhao<sup>1</sup>, Xiangzhong Zeng<sup>3</sup>, Kai Wei Xu<sup>1</sup>\*

**1** Department of Microbiology, College of Resources, Sichuan Agricultural University, Chengdu, China, **2** Department of Environmental Sciences, University of Helsinki, Helsinki, Finland, **3** Soil and Fertilizer Institute, Sichuan Academy of Agricultural Sciences, Chengdu, China

\* These authors contributed equally to this work.

\* [xkwei@sicau.edu.cn](mailto:xkwei@sicau.edu.cn) (KW); [cyxue11889@163.com](mailto:cyxue11889@163.com) (YXC)

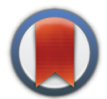

CrossMark  
click for updates

## OPEN ACCESS

**Citation:** Zou L, Chen YX, Penttinen P, Lan Q, Wang K, Liu M, et al. (2016) Genetic Diversity and Symbiotic Efficiency of Nodulating Rhizobia Isolated from Root Nodules of Faba Bean in One Field. PLoS ONE 11(12): e0167804. doi:10.1371/journal.pone.0167804

**Editor:** Xia Li, Institute of Genetics and Developmental Biology Chinese Academy of Sciences, CHINA

**Received:** July 9, 2016

**Accepted:** November 21, 2016

**Published:** December 9, 2016

**Copyright:** © 2016 Zou et al. This is an open access article distributed under the terms of the [Creative Commons Attribution License](https://creativecommons.org/licenses/by/4.0/), which permits unrestricted use, distribution, and reproduction in any medium, provided the original author and source are credited.

**Data Availability Statement:** All relevant data are within the paper and its supporting information.

**Funding:** This work was supported by National Key Research and Development Program of China (2016YFD0300300) YXC, the Special Fund for Agro-scientific Research in the Public Interest of China (No.201103005) XZZ.

**Competing Interests:** The authors have declared that no competing interests exist.

## Abstract

Thirty-one nodulating rhizobium strains were collected from root nodules of spring and winter type faba bean cultivars grown in micro ecoarea, i.e. the same field in Chengdu plain, China. The symbiotic efficiency and phylogeny of these strains were studied. Effectively nitrogen fixing strains were isolated from both winter type and spring type cultivars. Based on phylogenetic analysis of 16S rRNA gene and concatenated sequence of *atpD*, *glnII* and *recA* genes, the isolates were assigned as *Rhizobium anhuiense* and a potential new *Rhizobium* species. The isolates were diverse on symbiosis related gene level, carrying five, four and three variants of *nifH*, *nodC* and *nodD*, respectively. Strains carrying similar gene combinations were trapped by both winter and spring cultivars, disagreeing with the specificity of symbiotic genotypes to reported earlier faba bean ecotypes.

## Introduction

Biological nitrogen fixation (BNF) is important for agriculture worldwide. Legume-rhizobia symbiosis accounts 60% of the total BNF [1, 2]. In the symbiosis, rhizobia form nodules on the roots or stems of the host plant. Rhizobia reduce atmospheric dinitrogen into ammonia inside the nodules.

Faba bean is grown worldwide as a source of protein and starch [3]. In 2013, the biggest faba bean producing countries were China, Australia, France and Egypt [4]. Besides yielding food and fodder, faba bean provides assimilated nitrogen to other crops grown in crop rotation [5]. Faba bean are divided into three main ecotypes: winter faba bean that is sown in autumn and grown in Mediterranean and the south of China, spring faba bean that is sown in spring and grown mostly in Europe and the north of China, and the Chinese Yunnan ecotype that is sown in both autumn and spring [6, 7]. In symbiosis, faba bean is considered as a selective legume. Previous reports indicated that the isolations from faba bean root nodules contain *Rhizobium leguminosarum* symbiovar *viciae* and *trifolii*, *R. etli*, *R. fabae*, *R. laguerreae*, *R. mesosinicum*, *R. anhuiense* and *Agrobacterium tumefaciens* [8–14]. The symbiotic genotype of the

rhizobia determines the success in nodulating faba bean [15]. The faba bean ecotypes have been proposed to determine the distribution of rhizobial genomic and *nodC-nodD* types [9]. In addition, based on the phylogenetic analysis of *nodD* gene, faba bean symbionts were divided into groups roughly related to the division of winter and spring faba bean ecotypes [2].

In addition to the host cultivars, environmental conditions may affect the diversity of nodulating strains. Earlier we assessed the diversity of faba bean nodulating rhizobia on 21 sites with different environmental conditions across the Sichuan hilly areas, China [11]. For an insight into local diversity under uniform environmental conditions, and faba bean cultivars introduction experiment was coincidentally performed on one field in Sichuan agricultural university farm in Chengdu, so we collected nodules from fifteen faba bean cultivars grown on the same field in Chengdu, China, isolated nodulating rhizobia, and assessed their N<sub>2</sub>-fixation ability and phylogeny.

## Materials and Methods

### Isolation of the strains

Nodules were collected from fifteen faba bean cultivars grown on the research field of Sichuan Agricultural University in Chongzhou, Chengdu, Sichuan in 2013. Pink nodules were selected for isolation. The soil in the field was paddy soil with pH 6.3 and contained organic matter 37.6 g kg<sup>-1</sup>, total N 2.0 g kg<sup>-1</sup>, available N 136.0 mg kg<sup>-1</sup>, Olsen-P 20.4 mg kg<sup>-1</sup>, and exchangeable K 101.0 mg kg<sup>-1</sup>. After surface sterilization as described by Xu *et al.* [16], nodules were crushed and inoculated on YMA (yeast mannitol agar) medium supplemented with 25 mg L<sup>-1</sup> congo red as described [17]. Isolates were purified by streaking on YMA medium and incubated at 28°C. Purified strains were maintained on YMA at 4°C for temporary storage and in 25% glycerol at -80°C for long-term storage.

### Plant nodulation and symbiotic efficiency test

The plant nodulation and symbiotic efficiency test was carried out using hydroponically grown native winter type cultivar Hanyuan Dabaidou. The seeds were surface sterilized with 95% ethanol (5 min) and 0.2% HgCl<sub>2</sub> (3 min) followed by washing seven times with sterilized distilled water (5 min per time). Seeds were soaked overnight in sterilized water to soften the thick and hard seed coat. Sprouting, transplanting and inoculating were done as described previously by Xu *et al.* [16]. After 50 days, the plants were harvested and shoot dry mass and nodule numbers were measured. Excel 2010 (Microsoft, Redmond, USA) and SPSS 17.0 (SPSS Inc., Chicago, USA) were used to calculate the one-way analysis of variance with a least significant difference (LSD) analysis ( $P \leq 0.05$ ) of the mean values.

### Bacterial DNA extraction and PCR-RFLP of 16S rRNA gene and intergenic spacer region (IGS)

DNA was extracted as described by Little [18]. Primer pair P1 and P6 was used for amplification of 16S rRNA gene [11]. IGS was amplified using primer pair pHr (F) and p23SR01(R) [11]. Target sequences were amplified in Bio-RAD MyCycler<sup>TM</sup> with 20 pmol of each primer pair and 50 ng total DNA as template using a Golden Easy PCR System (TIANGEN, Beijing, China). The PCR protocols were as described by Xu *et al.* [16], except that the annealing temperature was 60°C for IGS.

16S rRNA gene and IGS PCR-RFLP were done using restriction endonucleases *TaqI*, *HaeIII*, *HinfI* and *MspI*. 5 µl of PCR product was digested by the restriction endonucleases separately in a 10 µl reaction volume following the manufacturer's instructions (Fermentas, EU).

The fragments were separated in 2% agarose gel containing 0.5  $\mu\text{g ml}^{-1}$  ethidium bromide at 80 V for 3 hours in 1 $\times$ TAE (Tris-Acetate-EDTA) buffer. Gels were documented with a Gel Document System (Bio-rad, USA). 16S RFLP and IGS RFLP analyses were done using the UPGMA clustering algorithm of NTSYSpc program [19].

## Sequence analyses

Eight isolates were selected for sequencing of housekeeping and symbiosis related genes. 16S rRNA gene, *atpD*, *glnII*, *recA*, *nifH*, *nodC* and *nodD* were amplified using the primer pairs P1/P6, *atpDF3/atpDR* [20], *glnII5/glnII6* [21], *recAF3/recAR3* [20], *nifHctg/nifHR* [22], *nodCF/nodCR* [23] and *NBA12F/NBA12R* [24], respectively, using the related protocols. The PCR products were directly sequenced at BGI Tech (Shenzhen, China). The sequences were compared with sequences in the NCBI database using BlastN to find reference sequences. The reference sequences and the sequences from the representative strains were aligned using ClustalW in MEGA 6.0 [25]. Phylogenetic trees were built using Neighbor-joining (NJ) method with 1000 resampling bootstrapping in MEGA 6.0. The percentage similarity of the genes was estimated using Distance in MEGA 6.0 [16]. In the multilocus sequence analysis of the concatenated housekeeping genes *atpD*, *recA* and *glnII*, we applied 97% similarity as the threshold for defining genospecies [26, 27].

## Results

### Isolation and symbiotic efficiency

Rhizobial bacteria were isolated from four spring type and eleven winter type faba bean cultivars grown in a single field in Chengdu plain (Table 1). The isolates formed nodules on the root of the native faba bean Hanyuan Dabaidou with the average nodule numbers ranging from 19 to 110 per plant. Compared to the uninoculated control, nine isolates increased significantly ( $P \leq 0.05$ ) the shoot dry mass of the plant, and were considered as potential inoculant strains (Table 1). The potential inoculant strains were isolated from three local Sichuan winter type faba bean cultivars and three spring type faba bean cultivars.

### RFLP analyses

The 16S rRNA gene of all the 31 isolates was successfully amplified and approximately 1500 bp single band was obtained. In the 16S rRNA gene RFLP analysis all the strains represented the same 16S genotype (Table 1). In the IGS PCR, one band was amplified from all the isolates except SCAUf57, SCAUf59, SCAUf66 and SCAUf69 for which two bands were detected. According to the IGS-RFLP, the isolates represented thirteen genotypes that were divided into four IGS groups with 10, 5, 2, and 14 isolates at 93% similarity (Fig 1). The nine significantly growth promoting isolates were distributed into groups IGS1 (4 strains), IGS2 (2 strains) and IGS4 (3 strains).

### Phylogenetic analysis of 16S rRNA gene

Based mainly on IGS RFLP while also considering the hosts of isolation, eight representative strains were selected for sequencing of the housekeeping and symbiosis genes. In accordance with the IGS RFLP (Fig 1), the strains were divided into three groups related to *Rhizobium* in the 16S rRNA gene phylogenetic tree (Fig 2). SCAUf82 clustered with *R. leguminosarum* USDA 2370<sup>T</sup> with 99.8% similarity (group R1). SCAUf61, SCAUf62 and SCAUf76 clustered with *R. laguerreae* FB206<sup>T</sup>, *R. leguminosarum* USDA 2370<sup>T</sup>, *R. anhuiense* CCBAU 23252<sup>T</sup>, *R.*

**Table 1. Rhizobial strains isolated in this study and their symbiotic and genotypic characteristics.**

| Strain <sup>a</sup> | Host cultivar <sup>b</sup> | Cultivar origin | Cultivar ecotype | Shoot dry mass                        | No. of nodules | 16S-RFLP genotype <sup>d</sup> | IGS-RFLP genotype <sup>e</sup> |
|---------------------|----------------------------|-----------------|------------------|---------------------------------------|----------------|--------------------------------|--------------------------------|
|                     |                            |                 |                  | (g plant <sup>-1</sup> ) <sup>c</sup> | per plant      |                                |                                |
| SCAUf68             | DB                         | Sichuan         | Winter           | 0.924±0.0724                          | 53             | A                              | XI                             |
| SCAUf65             | HN                         | Henan           | Spring           | 1.049±0.0621 <sup>†*</sup>            | 36.7           | A                              | XI                             |
| SCAUf64             | HN                         | Henan           | Spring           | 0.696±0.0214                          | 62             | A                              | VII                            |
| SCAUf73             | JX                         | Shanxi          | Spring           | 1.176±0.0922 <sup>†*</sup>            | 52.7           | A                              | X                              |
| SCAUf76             | JX                         | Shanxi          | Spring           | 1.019±0.0643 <sup>†*</sup>            | 64.3           | A                              | XII                            |
| SCAUf75             | JX                         | Shanxi          | Spring           | 0.849±0.144                           | 40.7           | A                              | XII                            |
| SCAUf74             | JX                         | Shanxi          | Spring           | 0.844±0.0767                          | 22             | A                              | XI                             |
| SCAUf70             | LP                         | Shandong        | Spring           | 1.073±0.0860 <sup>†*</sup>            | 19.3           | A                              | XI                             |
| SCAUf72             | LP                         | Shandong        | Spring           | 0.962±0.0656                          | 54.7           | A                              | XI                             |
| SCAUf71             | LP                         | Shandong        | Spring           | 0.685±0.0447                          | 98.3           | A                              | IX                             |
| SCAUf55             | S1                         | Sichuan         | Winter           | 0.829±0.264                           | 87             | A                              | II                             |
| SCAUf59             | S2                         | Sichuan         | Winter           | 1.006±0.0872                          | 50.3           | A                              | XI                             |
| SCAUf57             | S2                         | Sichuan         | Winter           | 0.907±0.0809                          | 47.7           | A                              | XI                             |
| SCAUf58             | S2                         | Sichuan         | Winter           | 0.899±0.138                           | 44             | A                              | XI                             |
| SCAUf56             | S2                         | Sichuan         | Winter           | 0.650±0.0893                          | 38.3           | A                              | XI                             |
| SCAUf61             | S3                         | Sichuan         | Winter           | 1.201±0.0914 <sup>†*</sup>            | 21.3           | A                              | XII                            |
| SCAUf60             | S3                         | Sichuan         | Winter           | 1.035±0.168 <sup>†*</sup>             | 69.3           | A                              | XII                            |
| SCAUf62             | S3                         | Sichuan         | Winter           | 0.862±0.141                           | 59             | A                              | VI                             |
| SCAUf63             | S4                         | Sichuan         | Winter           | 0.718±0.245                           | 74.3           | A                              | XII                            |
| SCAUf77             | S5                         | Sichuan         | Winter           | 1.051±0.255 <sup>†*</sup>             | 111.3          | A                              | XII                            |
| SCAUf78             | S5                         | Sichuan         | Winter           | 0.899±0.0552                          | 46             | A                              | I                              |
| SCAUf79             | S5                         | Sichuan         | Winter           | 0.764±0.210                           | 45             | A                              | XII                            |
| SCAUf81             | S6                         | Sichuan         | Winter           | 1.054±0.190 <sup>†*</sup>             | 124.3          | A                              | IV                             |
| SCAUf80             | S6                         | Sichuan         | Winter           | 1.013±0.0880 <sup>†*</sup>            | 114            | A                              | IV                             |
| SCAUf82             | S7                         | Sichuan         | Winter           | 0.819±0.0187                          | 19.7           | A                              | VIII                           |
| SCAUf83             | S8                         | Sichuan         | Winter           | 0.787±0.0987                          | 84.3           | A                              | XI                             |
| SCAUf84             | S9                         | Sichuan         | Winter           | 0.845±0.158                           | 14             | A                              | V                              |
| SCAUf85             | S9                         | Sichuan         | Winter           | 0.636±0.0633                          | 17.7           | A                              | XIII                           |
| SCAUf67             | YCDB                       | Zhejiang        | Winter           | 0.925±0.0691                          | 40.5           | A                              | XI                             |
| SCAUf66             | YCDB                       | Zhejiang        | Winter           | 0.883±0.0235                          | 34             | A                              | XI                             |
| SCAUf69             | ZZL                        | Tianjin         | Spring           | 0.980±0.0664                          | 110.3          | A                              | III                            |
| NC                  | -                          | -               | -                | 0.661±0.115                           | -              | -                              | -                              |

<sup>a</sup> The strains were deposited in Sichuan Agricultural University (SCAU) strain collection center. NC = uninoculated control in the symbiotic efficiency test.

<sup>b</sup> Faba bean cultivars: S1-S9 = Local Sichuan faba bean cultivars; JX = Jingxuan; LP = Lüpi; HN = Henan; ZZL = Zhenzhulü; YCDB = Yicundabai; DB = Dabai.

<sup>c†\*</sup> = the plant dry weight was significantly higher than that of NC according to the LSD test (P = 0.05). Data is shown as average ± standard error (n = 3).

<sup>d,e</sup> 16S-RFLP and IGS-RFLP genotype represents the combination of restriction patterns obtained by enzymes used (*HaeIII*, *HinfI*, *MspI*, and *TaqI*).

doi:10.1371/journal.pone.0167804.t001

*sophorae* CCBAU 03386<sup>T</sup> and *R. gallicum* R602sp<sup>T</sup> with 100% similarity (group R2). SCAUf59, SCAUf67, SCAUf68 and SCAUf70 clustered separately (group R3).

### Phylogenetic analyses of housekeeping genes

Three housekeeping genes (*atpD*, *glnII* and *recA*) were successfully amplified from all representative strains. In the multilocus sequence analysis (MLSA) tree that was based on concatenated gene sequences (Fig 3) and single gene trees (S1–S3 Figs) the representative

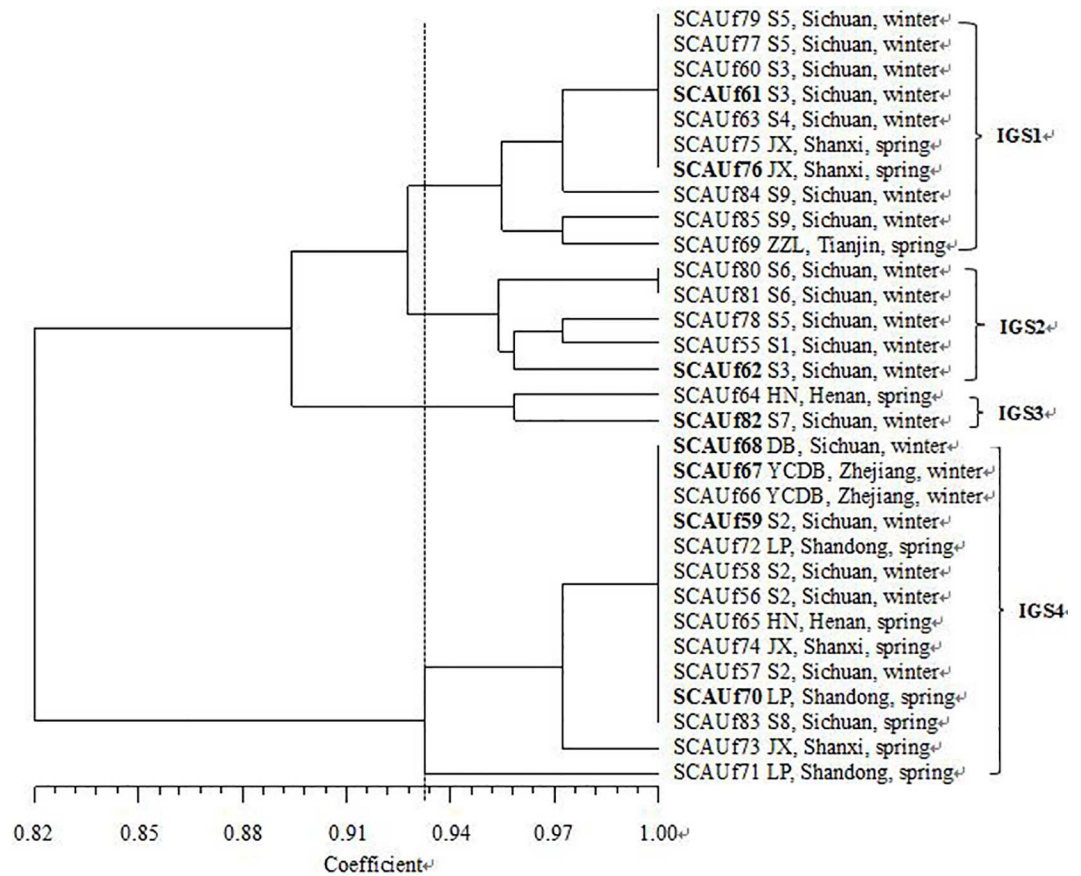

**Fig 1. IGS PCR-RFLP analysis by four restriction endonucleases (*MspI*, *HinfI*, *HaeIII* and *TaqI*) of strains isolated from faba bean nodules.** Strain number is followed by the name, the origin and the ecotype of the host of isolation. Abbreviations are as in the footnote of Table 1. The IGS PCR-RFLP groups are labeled with Roman numerals I to III. Isolates in bold were selected for sequencing of housekeeping and symbiosis genes.

doi:10.1371/journal.pone.0167804.g001

strains were divided into two clusters related to *Rhizobium*. SCAUf59, SCAUf67, SCAUf68 and SCAUf70 were 96.6% similar with the type strain *R. sophorae* CCBAU 03386<sup>T</sup> and were assigned as *Rhizobium* sp. SCAUf61, SCAUf62, SCAUf76, and SCAUf82 clustered with *R. anhuiense* CCBAU 23253<sup>T</sup> with 98.8% to 99.3% similarity in the MLSA, and were thus assigned as *R. anhuiense*.

### Phylogenetic analyses of symbiosis genes

Approximately 700 bp, 900 bp and 1500 bp fragments of *nifH*, *nodC* and *nodD*, respectively, were amplified from all the representative strains. In the *nifH* phylogenetic tree, the strains were distributed into five groups (Fig 4). The *Rhizobium* sp. SCAUf68, *R. anhuiense* SCAUf62 and *R. anhuiense* CCBAU 23252<sup>T</sup> *nifH* genes in the group H1 were 100% similar. *Rhizobium* sp. strain SCAUf59 clustered alone as group H2. In the group H3, *R. anhuiense* strains SCAUf61 and SCAUf76 carried a *nifH* gene 100% similar with *R. fabae* CCBAU 33202<sup>T</sup>. *R. anhuiense* strain SCAUf82 clustered with *R. leguminosarum* USDA 2370<sup>T</sup> and *R. pisi* DSM 30132<sup>T</sup> with 98.4% similarity in group H4. *Rhizobium* sp. strains SCAUf67 and SCAUf70 clustered separately in group H5.

In the *nodC* phylogenetic tree, the strains were distributed into four groups (Fig 5). *R. anhuiense* strains SCAUf61, SCAUf76 and SCAUf82 clustered with *R. fabae* CCBAU 33202<sup>T</sup>



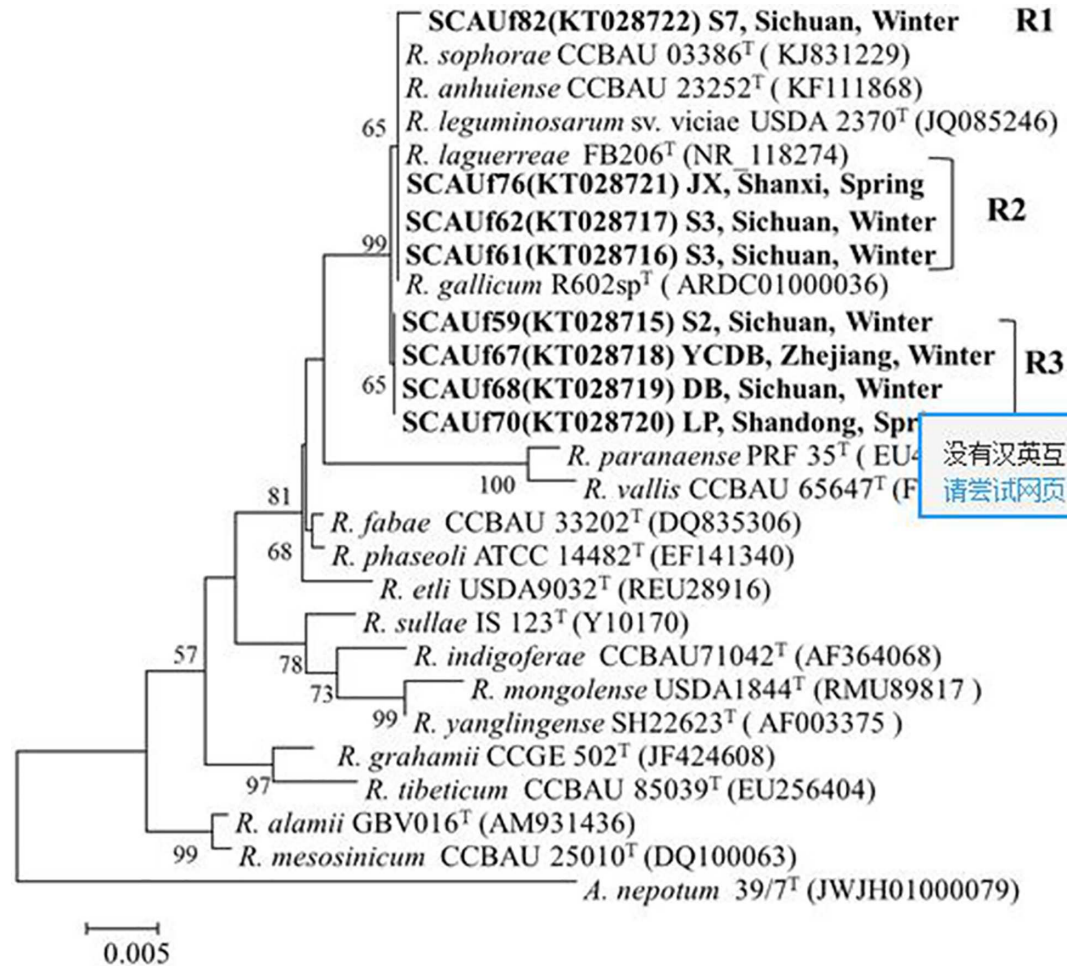

**Fig 2. The phylogenetic relationships between the representative faba bean strains and reference strains based on 16S rRNA gene sequences (1278 nt).** Genbank accession numbers are in parentheses. Bootstrap values above 50% are shown on the branches. Scale bar represents 0.2% nucleotide substitutions. *R.* *Rhizobium*.

doi:10.1371/journal.pone.0167804.g002

in group C1. *R. anhuiense* SAUf62 and *Rhizobium* sp. SCAUf68 clustered with *R. anhuiense* CCBAU 23252<sup>T</sup> with 100% similarity in group C2. *Rhizobium* sp. strains SCAUf67 and SCAUf70 clustered separately as group C3. SCAUf59 clustered with *Pisum sativum* symbionts in group C4 (Fig 5).

The *nodD* sequences were divided into three groups (Fig 6). *R. anhuiense* strains SCAUf61, SCAUf76 and SCAUf82 clustered with *R. fabae* CCBAU 33202<sup>T</sup> with 100% similarity in group D1. *R. anhuiense* SCAUf62 and *Rhizobium* sp. SCAUf68 carried *nodD* genes 100% similar to that of CCBAU 53093–2 in group D2. *Rhizobium* sp. strains SCAUf59, SCAUf67 and SCAU70 clustered with *R. leguminosarum* CCBAU 65264 and CCBAU 81100 with 100% similarity in group D3 (Fig 6).

## Discussion

Biological N<sub>2</sub> fixation (BNF) is a key component in sustainable agriculture since BNF can replace nitrogen fertilizer in growing legume crops. Improving legume yields requires efficiently nitrogen-fixing symbiotic bacteria, rhizobia. Efficient rhizobium strains may be selected and applied as inoculants to increase yields [20, 28].

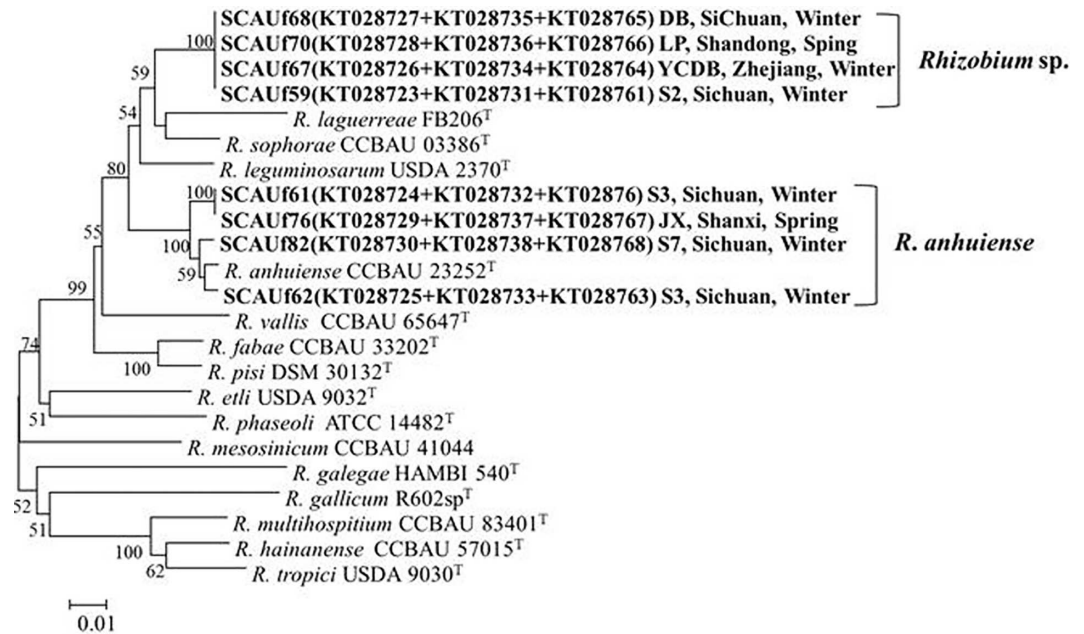

**Fig 3. The phylogenetic relationships between the representative faba bean strains and reference strains based on multilocus sequence analysis (MLSA) of *atpD* (411 nt), *glnII* (514 nt), and *recA* (384 nt) genes.** Genbank accession numbers are in parentheses. Bootstrap values above 50% are shown on the branches. Scale bar represents 1% nucleotide substitutions. *R.* *Rhizobium*.

doi:10.1371/journal.pone.0167804.g003

Faba bean cultivars are divided into three ecotypes: winter faba bean, spring faba bean and Yunnan ecotype [6, 7]. Based on the sequence analysis of symbiosis gene *nodD*, faba bean symbionts were divided into groups roughly related to the division of their hosts to winter and spring ecotypes [2]. The faba beans grown in Sichuan are the winter type. Earlier we isolated faba bean rhizobia from 21 sites covering most of the faba bean growing area in Sichuan [11]. The nodulating strains carried *nodC* similar to those of strains that nodulate winter type faba

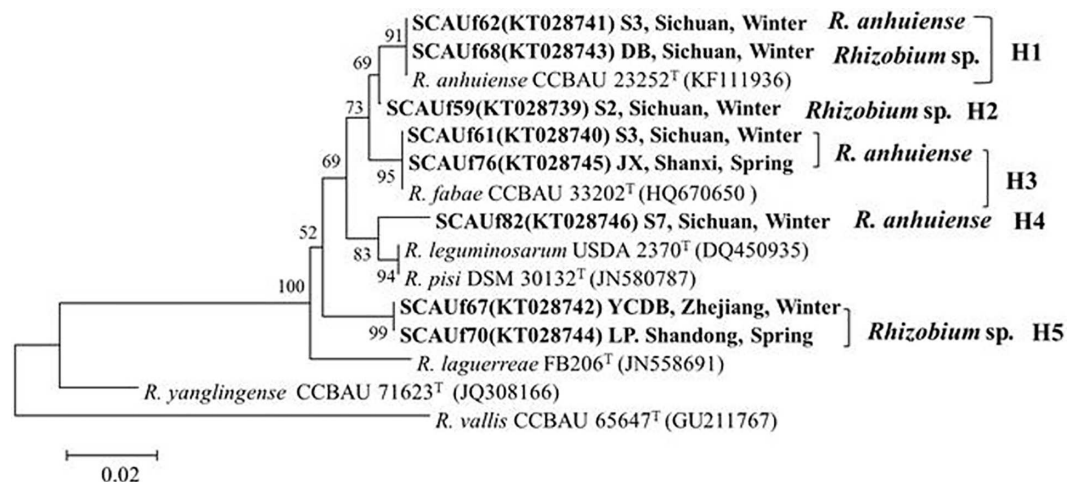

**Fig 4. Phylogenetic tree based on *nifH* (346 nt) gene of representative faba bean strains and reference strains.** Genbank accession numbers are in parentheses. Bootstrap values above 50% are shown on the branches. Scale bar represents 1% nucleotide substitutions. *R.* *Rhizobium*.

doi:10.1371/journal.pone.0167804.g004

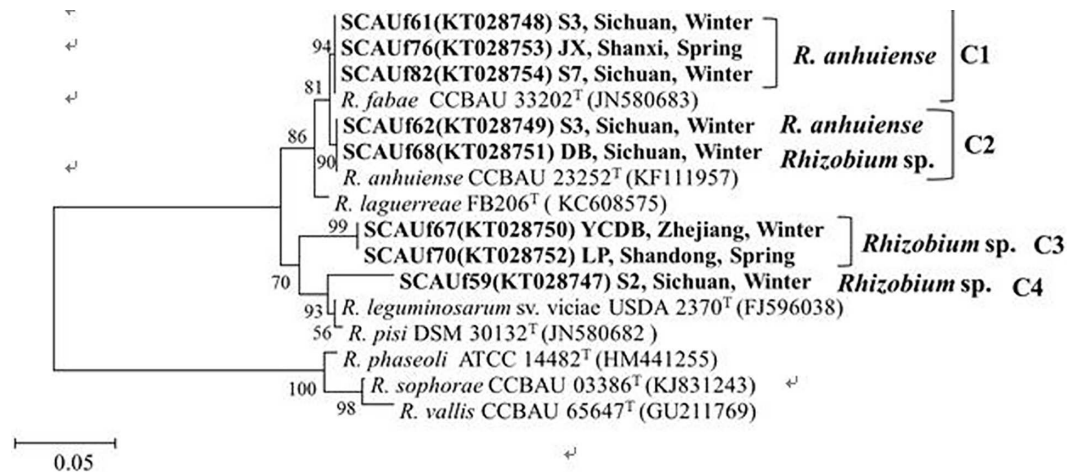

**Fig 5. Phylogenetic tree based on *nodC* (534 nt) gene of representative faba bean strains and reference strains.** Genbank accession numbers are in parentheses. Bootstrap values above 50% are shown on the branches. Scale bar represents 2% nucleotide substitutions. *R.* *Rhizobium*.

doi:10.1371/journal.pone.0167804.g005

bean and field pea [11]. In the present study, we collected 31 rhizobium strains from root nodules of fifteen faba bean cultivars grown on the same field. The growth of a local faba bean cultivar was significantly promoted by nine isolates, implying that these strains were potential inoculants. Potential inoculant strains were isolated from both winter type and spring type cultivars. The applicability of these strains must be further tested in field experiments.

Faba beans are mainly nodulated by *R. leguminosarum*, *R. etli*, *R. fabae* and *R. anhuiense* [9, 10, 13, 29]. In our earlier study we found that in Sichuan, in addition to *R. leguminosarum*,

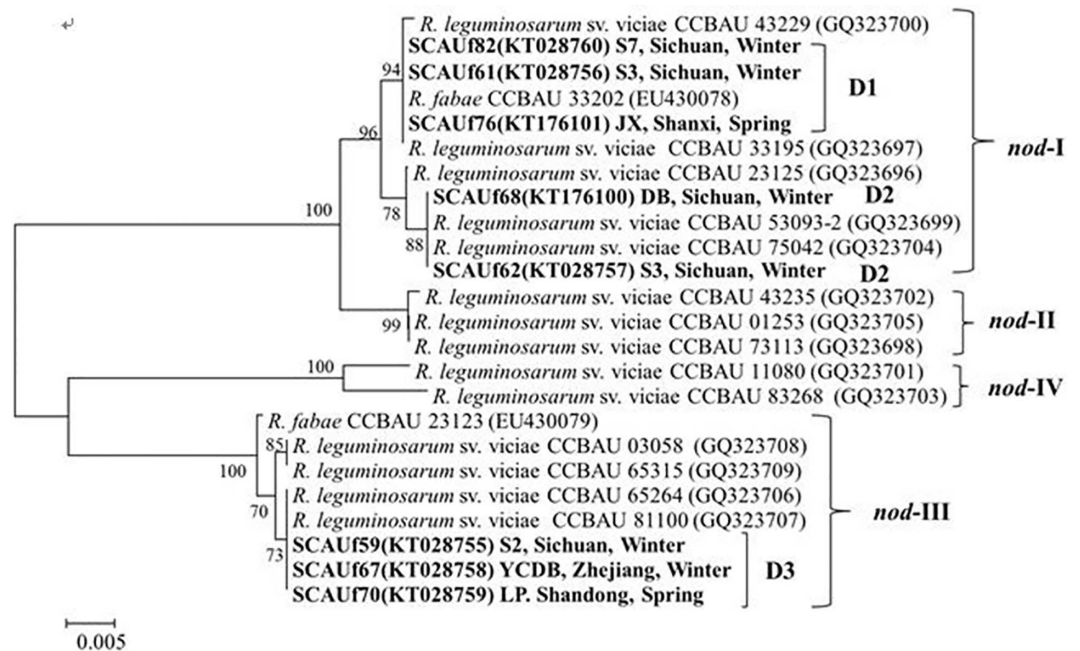

**Fig 6. Phylogenetic tree based on *nodD* (847 nt) gene of representative faba bean strains and reference strains.** Genbank accession numbers are in parentheses. Bootstrap values above 50% are shown on the branches. Scale bar represents 0.5% nucleotide substitutions. *R.* *Rhizobium*.

doi:10.1371/journal.pone.0167804.g006



**Table 2. The phylogenetic relationships of strains isolated from fifteen faba bean cultivars grown on the same field in Chengdu, China.**

| Strain <sup>a</sup>              | IGS group | The most similar species (sequence similarity with type strain, %) <sup>b</sup> |              |             |           |             |             |
|----------------------------------|-----------|---------------------------------------------------------------------------------|--------------|-------------|-----------|-------------|-------------|
|                                  |           | <i>atpD</i>                                                                     | <i>glnII</i> | <i>recA</i> | MLSA      | <i>nodC</i> | <i>nifH</i> |
| <i>R. anhuiense</i> (17)         |           |                                                                                 |              |             |           |             |             |
| <b>SCAUf61</b> , 60, 63, 69, 75, | IGS1      | Ra(98.5%)                                                                       | Ra(99.6%)    | Ra(98.2%)   | Ra(98.8%) | Rf(100%)    | Rf(100%)    |
| <b>SCAUf76</b> , 77, 79, 84, 85  |           | Ra(98.5%)                                                                       | Ra(99.6%)    | Ra(98.2%)   | Ra(98.8%) | Rf(100%)    | Rf(100%)    |
| <b>SCAUf62</b> , 55, 78, 80, 81  | IGS2      | Ra(99.7%)                                                                       | Ra(99.2%)    | Ra(98.8%)   | Ra(99.3%) | Ra(100%)    | Ra(100%)    |
| <b>SCAUf82</b> , 64              | IGS3      | Ra(99.7%)                                                                       | Ra(98.3%)    | Ra(100%)    | Ra(99.3%) | Rf(100%)    | Rle(98.4%)  |
| <i>Rhizobium</i> sp.(14)         |           |                                                                                 |              |             |           |             |             |
| <b>SCAUf59</b> , 56, 57, 58      | IGS4      | Rla(95.5%)                                                                      | Rle(98.1%)   | Rle(97.6%)  | Rs(96.6%) | Rle(96.0%)  | Ra(99.4%)   |
| <b>SCAUf67</b> , 65, 66          |           | Rla(95.5%)                                                                      | Rle(98.1%)   | Rle(97.6%)  | Rs(96.6%) | Rle(95.3%)  | Rle(96.8%)  |
| <b>SCAUf68</b> , 74, 83          |           | Rla(95.5%)                                                                      | Rle(98.1%)   | Rle(97.6%)  | Rs(96.6%) | Ra(100%)    | Ra(100%)    |
| <b>SCAUf70</b> , 71, 72, 73      |           | Rla(95.5%)                                                                      | Rle(98.1%)   | Rle(97.6%)  | Rs(96.6%) | Rle(95.3%)  | Rle(96.8%)  |

<sup>a</sup> Strains in this study(number of isolates). The isolates in bold face were representative strains and were used in 16S rRNA, *recA*, *glnII*, *atpD*, *nifH*, and *nodC* genes sequencing.

<sup>b</sup> MLSA: Multilocus sequence analysis of concatenated *atpD*, *glnII* and *recA* genes. Ra = *R. anhuiense*; Rf = *R. fabae*; Rla = *R. laguerreae*; Rle = *R. leguminosarum*; Rs = *R. sophorae*.

doi:10.1371/journal.pone.0167804.t002

faba bean was nodulated by five *Rhizobium* species [11]. *R. leguminosarum* strains are quite diverse, and the Sichuan *R. leguminosarum* strains were divided to two distantly related groups [11, 30]. In this study, based on both 16S rRNA gene and multilocus sequence analyses of three housekeeping genes, the representative isolates were assigned as *R. anhuiense* and a potential new *Rhizobium* species.

16S rRNA gene and housekeeping gene sequence analyses are usually applied to assess the phylogenetic position of rhizobia, whereas analyses of symbiosis related genes reveal the symbiotic genotype of rhizobia. Comparison of housekeeping and symbiosis genes gives crucial information on how rhizobia evolve [31]. The symbiosis related genes are commonly on mobile genetic elements that are transferrable between strains [32]. The *nifH* gene, encoding the nitrogenase Fe protein, is essential for symbiotic nitrogen fixation [33]. The *nodC* is essential for the synthesis of the aminosugar backbone of rhizobial signaling molecules [34]. The *nodD* encodes a transcriptional regulator of *nod* genes [2]. The faba bean nodulating Sichuan *R. leguminosarum* strains carried three different *nifH* and *nodC* variants [11]. In addition to them, we found two and one new variants of *nifH* and *nodC*, respectively. Legumes may be classified as promiscuous or selective according to the number of rhizobia they are compatible with. For example, in Sichuan the promiscuous *Leucaena leucocephala* was nodulated by seven rhizobial species [35]. However, on nodulation gene (*nodC*) level there was less diversity [16]. Interestingly, the species and nodulation gene diversity of the faba bean symbionts was the opposite: two species that carry four variants of *nodC*, raising an intriguing question on what ultimately governs the host specificity. Both *R. anhuiense* and *Rhizobium* sp. included strains with respective three different *nifH-nodC* combinations (Table 2), indicating that the genes had been horizontally transferred (Table 2). The *nodD* variants D3 and D1 were found together with two different *nifH-nodC* combinations suggesting a possible partial transfer of symbiotic island or plasmid (Table 2).

The genotypes *nod-I* and *nod-III* are the dominant *nodD* genotypes of winter type and Yun-nan-China type faba beans, respectively [2, 29]. In our study, the isolates carried three *nodD* variants. The variants D1 and D2 clustered with *nod-I*, and the variant D3 with *nod-III*. Strains carrying similar *nodD* gene variants and *nifH-nodC* combinations were trapped by both winter

and spring cultivars, disagreeing with the division of *nodD* to cultivar specific variants. Obviously, analysis of a greater number of strains is needed to conclude whether the different cultivars favor certain *nodD* gene variants. Instead of cultivar specificity, the division of *nodD* types may be geographical. Since Sichuan is in between the spring type, winter type and Yunnan type faba bean cultivation areas, finding rhizobia carrying different *nodD* genotypes may be expected.

In all, the soil hosted *R. anhuiense* and a potential new *Rhizobium* species that were diverse on the symbiosis related gene level. The strains nodulated both winter and spring type cultivars. Even though the rhizobia may be co-introduced with the host [36], isolating similar strains from both winter and spring type cultivars indicates that the strains originated from soil, not seed. The local genetic diversity under uniform environmental conditions was equal to diversity of nodulating strains collected from many sampling sites with different conditions and cultivars, indicating that the symbiotic specificity of the faba bean rhizobia was related to the cultivars.

## Supporting Information

**S1 Fig. Phylogenetic tree based on *atpD* (396 nt) genes of the representative strains isolated from fababean and reference strains.** Genbank accession numbers are in parentheses. Bootstrap values  $\geq 50\%$  are shown on the branches. Scale bar represents 1% nucleotide substitutions. *R: Rhizobium*.

(JPG)

**S2 Fig. Phylogenetic tree based on *glnII* (483 nt) genes of the representative strains isolated from fababean and reference strains.** Genbank accession numbers are in parentheses. Scale bar represents 1% nucleotide substitutions. Bootstrap values  $\geq 50\%$  are shown on the branches. *R: Rhizobium*.

(JPG)

**S3 Fig. Phylogenetic tree based on *recA* (345 nt) genes of the representative strains isolated from fababean and reference strains.** Genbank accession numbers are in parentheses. Bootstrap values  $\geq 50\%$  are shown on the branches. Scale bar represents 1% nucleotide substitutions. *R: Rhizobium*.

(JPG)

## Acknowledgments

The authors would like to thank all the colleagues that provided us help to accomplish this study. Dong Sheng Guo and Jin Hu Zhu provided the help in collecting nodules.

## Author Contributions

**Conceptualization:** LZ KWX YXC.

**Data curation:** LZ KWX.

**Formal analysis:** LZ YXC KWX QL ML DP.

**Funding acquisition:** YXC XZ KWX.

**Investigation:** YXC KW.

**Methodology:** LZ YXC KWX.

**Project administration:** YXC XZ QC KZ XZ.

**Resources:** YXC KWX.

**Software:** LZ.

**Supervision:** YXC KWX.

**Validation:** YXC KWX.

**Visualization:** PP.

**Writing – original draft:** LZ KWX PP.

**Writing – review & editing:** LZ KWX PP YXC.

## References

1. Herridge DF, Peoples MB, Boddey RM. Global inputs of biological nitrogen fixation in agricultural systems. *Plant Soil*. 2008; 311: 1–18.
2. Tian CF, Young JP, Wang ET, Tamimi SM, Chen WX. Population mixing of *Rhizobium leguminosarum* bv. *viciae* nodulating *Vicia faba*: the role of recombination and lateral gene transfer. *FEMS Microbiol Ecol*. 2010; 73: 563–576. doi: [10.1111/j.1574-6941.2010.00909.x](https://doi.org/10.1111/j.1574-6941.2010.00909.x) PMID: [20533948](https://pubmed.ncbi.nlm.nih.gov/20533948/)
3. Flores F, Nadal S, Solis I, Winkler J, Sass O, Stoddard FL, et al. Faba bean adaptation to autumn sowing under European climates. *Agro Sustain Dev*. 2012; 32: 727–734.
4. FAOSTAT. Statistical Database of the Food and Agricultural Organization of the United Nations. 2013. Available: <http://faostat.fao.org/>
5. Köpke U, Nemecek T. Ecological services of faba bean. *Field Crops Res*. 2010; 115: 217–233.
6. Duc G, Bao S, Baum M, Redden B, Sadiki M, Suso MJ, et al. Diversity maintenance and use of *Vicia faba* L. genetic resources. *Field Crops Res*. 2010; 115: 270–278.
7. Ye Y. Faba bean in China (in Chinese). 1st ed. China Agriculture Press; 2003.
8. Saïdi S, Ramírez-Bahena MH, Santillana N, Zúñiga D, Álvarez-Martínez E, Peix A, et al. *Rhizobium laguerreae* sp. nov. nodulates *Vicia faba* on several continents. *Int J Syst Evol Microbiol*. 2014; 64: 242–247. doi: [10.1099/ijs.0.052191-0](https://doi.org/10.1099/ijs.0.052191-0) PMID: [24067731](https://pubmed.ncbi.nlm.nih.gov/24067731/)
9. Tian CF, Wang ET, Han TX, Sui XH, Chen WX. Genetic diversity of rhizobia associated with *Vicia faba* in three ecological regions of China. *Arch Microbiol*. 2007; 188: 273–282. doi: [10.1007/s00203-007-0245-6](https://doi.org/10.1007/s00203-007-0245-6) PMID: [17479251](https://pubmed.ncbi.nlm.nih.gov/17479251/)
10. van Berkum P, Beyene D, Vera FT, Keyser HH. Variability among *Rhizobium* strains originating from nodules of *Vicia faba*. *Appl Environ Microbiol*. 1995; 61: 2649–2653. PMID: [16535075](https://pubmed.ncbi.nlm.nih.gov/16535075/)
11. Xu KW, Zou L, Penttinen P, Wang K, Heng NN, Zhang XP, et al. Symbiotic effectiveness and phylogeny of rhizobia isolated from faba bean (*Vicia faba* L.) in Sichuan hilly areas, China. *Syst Appl Microbiol*. 2015; 38: 515–523. doi: [10.1016/j.syapm.2015.06.009](https://doi.org/10.1016/j.syapm.2015.06.009) PMID: [26242694](https://pubmed.ncbi.nlm.nih.gov/26242694/)
12. Youseif SH, El-Megeed FHA, Ageez A, Cocking EC, Saleh SA. Phylogenetic multilocus sequence analysis of native rhizobia nodulating faba bean (*Vicia faba* L.) in Egypt. *Syst Appl Microbiol*. 2014; 37: 560–569. doi: [10.1016/j.syapm.2014.10.001](https://doi.org/10.1016/j.syapm.2014.10.001) PMID: [25458609](https://pubmed.ncbi.nlm.nih.gov/25458609/)
13. Zhang YJ, Zheng WT, Everall I, Young JP, Zhang XX, Tian CF, et al. *Rhizobium anhuiense* sp. nov., isolated from effective nodules of *Vicia faba* and *Pisum sativum*. *Int J Syst Evol Microbiol*. 2015; 65:2960–2967. doi: [10.1099/ijs.0.000365](https://doi.org/10.1099/ijs.0.000365) PMID: [26025940](https://pubmed.ncbi.nlm.nih.gov/26025940/)
14. Santillana N, Ramírez-Bahena MH, García-Fraile P, Velázquez E, Zúñiga D. Phylogenetic diversity based on *rrs*, *atpD*, *recA* genes and 16S–23S intergenic sequence analyses of rhizobial strains isolated from *Vicia faba* and *Pisum sativum* in Peru. *Arch Microbiol*. 2008; 189:239–247. doi: [10.1007/s00203-007-0313-y](https://doi.org/10.1007/s00203-007-0313-y) PMID: [17985116](https://pubmed.ncbi.nlm.nih.gov/17985116/)
15. Laguerre G, Louvrier P, Allard MR, Amager N. Compatibility of rhizobial genotypes within natural populations of *Rhizobium leguminosarum* biovar *viciae* for nodulation of host legumes. *Appl Environ Microbiol*. 2003; 69: 2276–2283. doi: [10.1128/AEM.69.4.2276-2283.2003](https://doi.org/10.1128/AEM.69.4.2276-2283.2003) PMID: [12676710](https://pubmed.ncbi.nlm.nih.gov/12676710/)
16. Xu KW, Penttinen P, Chen YX, Chen Q, Zhang XP. Symbiotic efficiency and phylogeny of the rhizobia isolated from *Leucaena leucocephala* in arid-hot river valley area in Panxi, Sichuan, China. *Appl Microbiol Biotechnol*. 2013a; 97: 783–793.
17. Vincent JM. A manual for the practical study of the root-nodule bacteria. In: IBP Handbook No. 15, Black Well Scientific Publications, Oxford. 1970.

18. Little MC. Patent No. 5,075,430. Washington, DC: U.S. Patent and Trademark Office, U.S. 1991.
19. Rohlf FJ. NTSYS-pc, Numerical taxonomy and multivariate analysis system, version 2.02. Exter Software, Setauket, N.Y. 1990.
20. Chen YX, Zhou T, Penttinen P, Zou L, Wang K, Cui YQ, et al. Symbiotic matching, taxonomic position, and field assessment of symbiotically efficient rhizobia isolated from soybean root nodules in Sichuan, China. *Biol Fertil Soils*. 2015; 51: 707–718.
21. Vinuesa P, Silva C, Werner D, Martínez-Romero E. Population genetics and phylogenetic inference in bacterial molecular systematics: the roles of migration and recombination in *Bradyrhizobium* species cohesion and delineation. *Mol Phylogenet Evol*. 2005; 34: 29–54. doi: [10.1016/j.ympev.2004.08.020](https://doi.org/10.1016/j.ympev.2004.08.020) PMID: [15579380](https://pubmed.ncbi.nlm.nih.gov/15579380/)
22. Gurkanli CT, Ozkoc I, Gunduz I. Genetic diversity of *Vicia faba* L. and *Pisum sativum* L. nodulating rhizobia in the central Black Sea region of Turkey. *Ann Microbiol*. 2014; 64: 99–112.
23. Sarita S, Sharma PK, Priefer UB, Prell J. Direct amplification of rhizobial *nodC* sequences from soil total DNA and comparison to *nodC* diversity of root nodule isolates. *FEMS Microbiol Ecol*. 2005; 54: 1–11. doi: [10.1016/j.femsec.2005.02.015](https://doi.org/10.1016/j.femsec.2005.02.015) PMID: [16329967](https://pubmed.ncbi.nlm.nih.gov/16329967/)
24. Laguerre G, Mavingui P, Allard MR, Charnay MP, Louvrier P, Mazurier SI, et al. Typing of rhizobia by PCR DNA fingerprinting and PCR-restriction fragment length polymorphism analysis of chromosomal and symbiotic gene regions: application to *Rhizobium leguminosarum* and its different biovars. *Appl Environ Microbiol*. 1996; 62: 2029–2036. PMID: [8787401](https://pubmed.ncbi.nlm.nih.gov/8787401/)
25. Tamura K, Stecher G, Peterson D, Filipinski A, Kumar S. MEGA6: molecular evolutionary genetics analysis version 6.0. *Mol Biol Evol*. 2013; 30: 2725–2729. doi: [10.1093/molbev/mst197](https://doi.org/10.1093/molbev/mst197) PMID: [24132122](https://pubmed.ncbi.nlm.nih.gov/24132122/)
26. Cao Y, Wang ET, Zhao L, Chen WM, Wei GH. 2014. Diversity and distribution of rhizobia nodulated with *Phaseolus vulgaris* in two ecoregions of China. *Soil Biol Biochem*. 2014; 78: 128–137.
27. Ribeiro RA, Ormeno-Orrillo E, Dall'Agnol RF, Graham PH, Martinez-Romero E, Hungria M. Novel *Rhizobium* lineages isolated from root nodules of the common bean (*Phaseolus vulgaris* L.) in Andean and Mesoamerican areas. *Res Microbiol*. 2013; 164: 740–748. doi: [10.1016/j.resmic.2013.05.002](https://doi.org/10.1016/j.resmic.2013.05.002) PMID: [23764913](https://pubmed.ncbi.nlm.nih.gov/23764913/)
28. Cardoso JD, Hungria M, Andrade DS. Polyphasic approach for the characterization of rhizobial symbionts effective in fixing N<sub>2</sub> with common bean (*Phaseolus vulgaris* L.). *Appl Microbiol Biotechnol*. 2012; 93: 2035–2049. doi: [10.1007/s00253-011-3708-2](https://doi.org/10.1007/s00253-011-3708-2) PMID: [22159885](https://pubmed.ncbi.nlm.nih.gov/22159885/)
29. Tian CF, Wang ET, Wu LJ, Han TX, Chen WF, Gu CT, et al. *Rhizobium fabae* sp. nov., a bacterium that nodulates *Vicia faba*. *Int J Syst Evol Microbiol*. 2008; 58: 2871–2875. doi: [10.1099/ijs.0.2008/000703-0](https://doi.org/10.1099/ijs.0.2008/000703-0) PMID: [19060074](https://pubmed.ncbi.nlm.nih.gov/19060074/)
30. Mousavi SA, Willems A, Nesme X, de Lajudie P, Lindström K. Revised phylogeny of Rhizobiaceae: Proposal of the delineation of *Pararhizobium* gen. nov., and 13 new species combinations. *Syst Appl Microbiol*. 2015; 38: 84–90. doi: [10.1016/j.syapm.2014.12.003](https://doi.org/10.1016/j.syapm.2014.12.003) PMID: [25595870](https://pubmed.ncbi.nlm.nih.gov/25595870/)
31. Wernegreen JJ, Riley MA. Comparison of the evolutionary dynamics of symbiotic and housekeeping loci: a case for the genetic coherence of rhizobial lineages. *Mol Biol Evol*. 1999; 16: 98–113. PMID: [10331255](https://pubmed.ncbi.nlm.nih.gov/10331255/)
32. Sullivan JT, Patrick HN, Lowther WL, Scott DB, Ronson CW. Nodulating strains of *Rhizobium loti* arise through chromosomal symbiotic gene transfer in the environment. *Proc Natl Acad Sci*. 1995; 92: 8985–8989. PMID: [7568057](https://pubmed.ncbi.nlm.nih.gov/7568057/)
33. Raymond J, Siefert JL, Staples CR, Blankenship RE. The natural history of nitrogen fixation. *Mol Biol Evol*. 2004; 21: 541–554. doi: [10.1093/molbev/msh047](https://doi.org/10.1093/molbev/msh047) PMID: [14694078](https://pubmed.ncbi.nlm.nih.gov/14694078/)
34. Luyten E, Vanderleyden J. Survey of genes identified in *Sinorhizobium meliloti* spp., necessary for the development of an efficient symbiosis. *Eur J Soil Biol*. 2000; 36: 1–26.
35. Xu KW, Penttinen P, Chen YX, Zou L, Zhou T, Zhang XP, et al. Polyphasic characterization of rhizobia isolated from *Leucaena leucocephala* from Panxi, China. *World J Microbiol Biotechnol*. 2013b; 29:
36. Lindström K, Murwira M, Willems A, Altier N. The biodiversity of beneficial microbe-host mutualism: the case of rhizobia. *Res Microbiol*. 2010; 161: 453–463. doi: [10.1016/j.resmic.2010.05.005](https://doi.org/10.1016/j.resmic.2010.05.005) PMID: [20685242](https://pubmed.ncbi.nlm.nih.gov/20685242/)
